# Supplementary material for: Genome-wide methylation analysis reveals differentially methylated CpG sites and altered expression of heart development-associated genes in fetuses with cardiac defects
Source: PubMed Central journal article supplement — Exp Ther Med. 2021 Jul 18;22(3):1032. doi: 10.3892/etm.2021.10464 (PMC8343574; doi:10.3892/etm.2021.10464), 2021-07-18
Supplement: Supplementary_Data1.pdf [file Supplementary_Data1.pdf]

Table SI. Characteristics of samples used for genome-wide methylation microarray analysis to obtain a list of differentially methylated regions.

| Variable                | Controls  | Isolated cardiac defects | Non-isolated cardiac defects |
|-------------------------|-----------|--------------------------|------------------------------|
| Number of subjects      | 4         | 2                        | 3                            |
| Gestational age (weeks) | 24.1±0.84 | 23.9±0.49                | 24.4±1.05                    |
| Maternal age (years)    | 29.2±6.71 | 31.7±3.01                | 30.8±5.81                    |

Table SII. Phenotypes of samples with cardiac defects used for genome-wide methylation microarray analysis.

| Categories                   | Subtypes of cardiac defects | Number of subjects |
|------------------------------|-----------------------------|--------------------|
| Isolated cardiac defects     | PTA, VSD                    | 1                  |
|                              | Overriding aorta, VSD, PS   | 1                  |
| Non-isolated cardiac defects | AVSD, DORV                  | 1                  |
|                              | HRV, VSD, PS                | 1                  |
|                              | SA, SV                      | 1                  |

PTA, persistent truncus arteriosus; VSD, ventricle septum defect; PS, pulmonary stenosis; AVSD, atrioventricular septum defect; DORV, double outflow right ventricle; HRV, hypoplasia of right heart; SA, single atrium; SV, single ventricle.

Table SIII. Characteristics of samples used for genome-wide methylation microarray analysis to validate differentially methylated regions.

| Variable                | Controls  | Isolated cardiac defects | Non-isolated cardiac defects |
|-------------------------|-----------|--------------------------|------------------------------|
| Number of subjects      | 18        | 15                       | 11                           |
| Gestational age (weeks) | 23.5±1.56 | 24.5±1.61                | 23.1±2.71                    |
| Maternal age (years)    | 29.2±6.71 | 31.7±3.01                | 30.8±5.81                    |

Table SIV. Phenotypes of samples with cardiac defects used for MassARRAY analysis.

| Categories                           | Subtypes of cardiac defects                  | Number of subjects            |   |
|--------------------------------------|----------------------------------------------|-------------------------------|---|
| Isolated cardiac defects             | Tetralogy of fallot                          | 5                             |   |
|                                      | PTA, VSD, severe PS, single outflow tract    | 1                             |   |
|                                      | HLHS                                         | 1                             |   |
|                                      | AVSD                                         | 1                             |   |
|                                      | HRV, VSD, DORV                               | 1                             |   |
|                                      | AVSD, Overriding aorta, VSD, PS              | 1                             |   |
|                                      | Overriding aorta, VSD, PS, right aortic arch | 1                             |   |
|                                      | Severe tricuspid dysplasia                   | 1                             |   |
|                                      | HRV, PS                                      | 1                             |   |
|                                      | primary ASD                                  | 1                             |   |
|                                      | HRV, AC, VSD, parallel aorta                 | 1                             |   |
|                                      | Non-isolated cardiac defects                 | Overriding aorta, DORV, VSD   | 1 |
|                                      |                                              | AC                            | 1 |
|                                      |                                              | aortic and pulmonary stenosis | 1 |
| AVSD, DORV                           |                                              | 1                             |   |
| asymmetric four-chamber (no details) |                                              | 1                             |   |
| Single outflow tract                 |                                              | 1                             |   |
| SA, SV                               |                                              | 1                             |   |
| SV, PS, right aortic arch            |                                              | 1                             |   |
| Tetralogy of fallot                  |                                              | 1                             |   |
| PTA, HLHS                            |                                              | 1                             |   |
| Overriding aorta, VSD, PS            | 1                                            |                               |   |

PTA, persistent truncus arteriosus; VSD, ventricle septum defect; PS, pulmonary stenosis; HLHS, hypoplastic left heart; AVSD, atrioventricular septum defect; HRV, hypoplasia of right heart; DORV, double outflow of right ventricle; ASD, atrial septum defect; AC, coarctation of aorta; SA, single atrium; SV, single ventricle.

Table SV. Primers used for validation of methylation level of CpG sites adjacent to heart development-related genes by MassARRAY.

| CpG site location        | Forward 10-mer tag primer 1   | Reverse T7 promoter tag 2      | Product size (bp) | Assayed CGs (n) |
|--------------------------|-------------------------------|--------------------------------|-------------------|-----------------|
| Chr7:55379459-55380266   | CTCCCCACTAAAACCC<br>ATACCC    | GAGAGTATTTATAGGGGAGG<br>TTTAGG | 301               | 24              |
| Chr9:138514624-138515325 | CCTCCCCCTAAACTACAAC<br>TAAAAA | GGAGGGTAGGTGGGTATATA<br>GGTAGT | 396               | 21              |
| Chr21:45877482-45878832  | CCAACCTTCAAACCCTA<br>TAAACT   | GGAAGTATTTTTTTGGTGTGGT         | 375               | 37              |

1,10-mer tag, cagtaatacactcactataggagaagg and 2;T7 promoter tag, aggaagagag were added.

Table SVI. Primers used for reverse transcription-quantitative PCR.

| Gene    | Primer  | Sequence (5'-3')      |
|---------|---------|-----------------------|
| GAPDH   | Forward | CACCCACTCCTCCACC TTTG |
|         | Reverse | ACCACCCTGTTGCT GTAGCC |
| EGFR    | Forward | CAGGAGGTGGCTGGTTATGT  |
|         | Reverse | AGCTCCTTCAGTCCGGTTTT  |
| SLC19A1 | Forward | CGGCTACTACCTGGTGGTCT  |
|         | Reverse | GATGAGCAGCTTGGACCAG   |
| NOTCH1  | Forward | CGCGTCAATGACTTCCA     |
|         | Reverse | GCAGGTACGAGCGTCATTCT  |

EGFR, epidermal growth factor receptor; SLC19A1, solute carrier family 19 member 1.
